# Supplementary material for: Stratification of the Gut Microbiota Composition Landscape across the Alzheimer's Disease Continuum in a Turkish Cohort
Source: PubMed Central journal article supplement (PMC8823292; doi:10.1128/msystems.00004-22), 2022-02-08

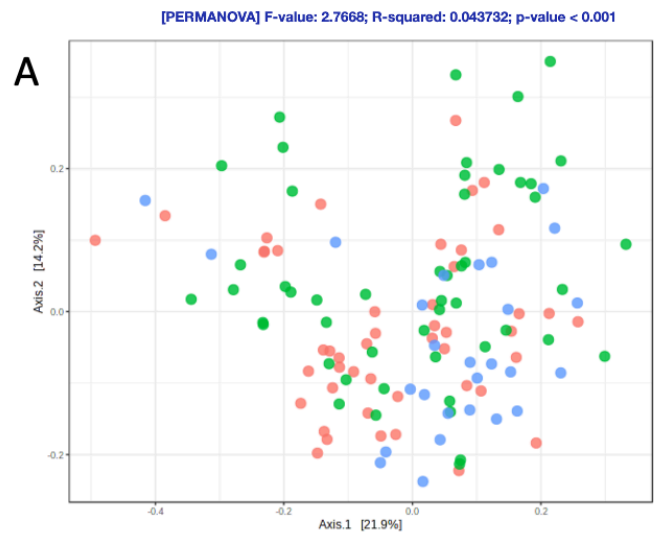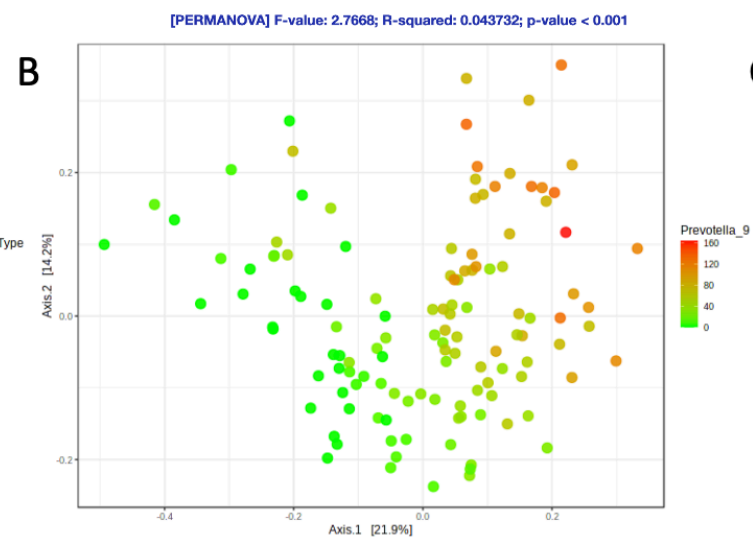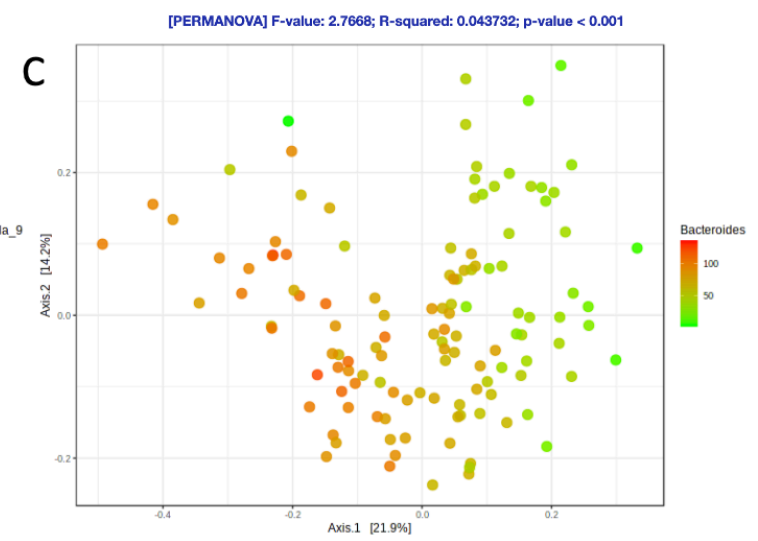

Supplement: msystems.00004-22-sf002.pdf [file msystems.00004-22-sf002.pdf]
